# Supplementary material for: A Genome-Wide Association Analysis Reveals Epistatic Cancellation of Additive Genetic Variance for Root Length in Arabidopsis thaliana
Source: PubMed Central journal article supplement (PMC4580642; doi:10.1371/journal.pgen.1005541), 2015-09-23

**A**

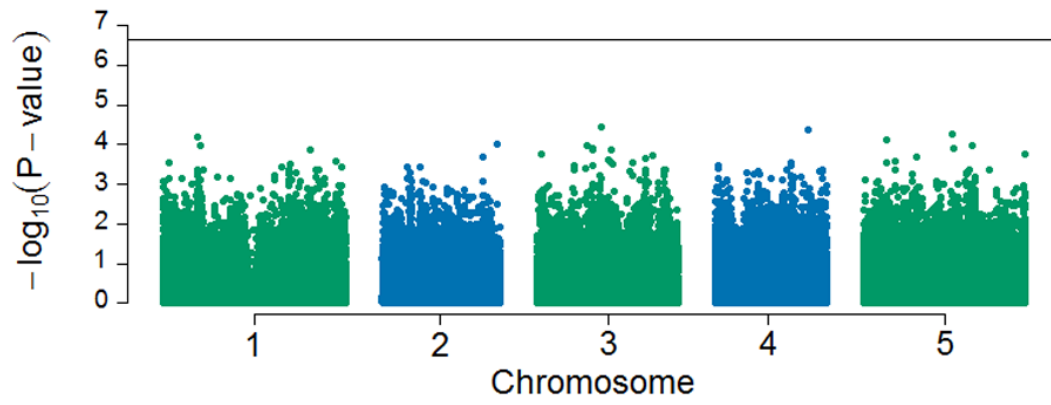

**B**

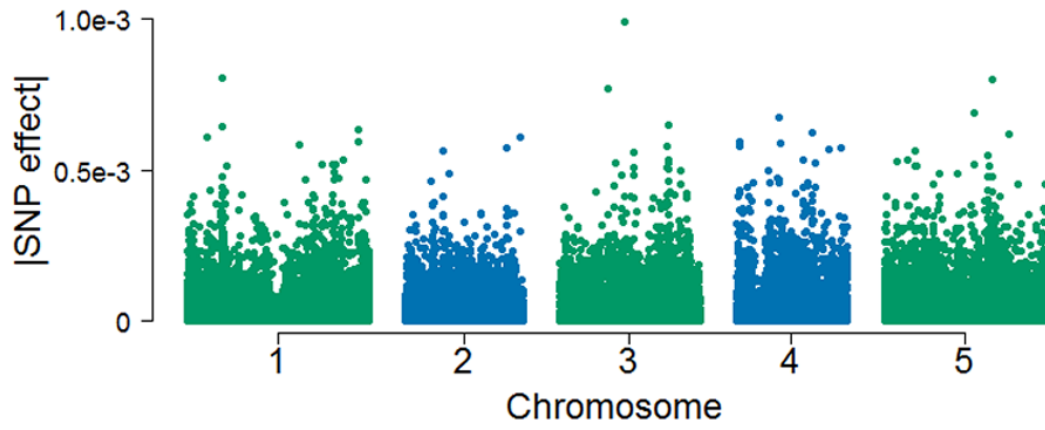

Supplement: pgen.1005541.s002.pdf [file pgen.1005541.s002.pdf]
